# Supplementary material
Source: PubMed Central journal article supplement (PMC8436596)
Supplement: NIHMS1733959-supplement-Appendix_A.pdf [file NIHMS1733959-supplement-Appendix_A.pdf]

## Appendix A. Summary of study variables reported among infants born in 2017, nine states

| <b>Variable</b>                              | <b>Definition</b>                                                                                                                                    |
|----------------------------------------------|------------------------------------------------------------------------------------------------------------------------------------------------------|
| <b>Child's date of birth</b>                 | Date the child was born                                                                                                                              |
| <b>NICU* status</b>                          | Whether the child was in the NICU (any unit other than well baby unit)                                                                               |
| Yes                                          |                                                                                                                                                      |
| No                                           |                                                                                                                                                      |
| <b>WIC** status</b>                          | Whether the child's mother received WIC food packages                                                                                                |
| Yes                                          |                                                                                                                                                      |
| No                                           |                                                                                                                                                      |
| <b>Mother's date of birth</b>                | Birthdate of the child's mother                                                                                                                      |
| <b>Maternal race</b>                         | Classification of mother's race                                                                                                                      |
| White                                        |                                                                                                                                                      |
| Black                                        |                                                                                                                                                      |
| Asian/Pacific islanders                      |                                                                                                                                                      |
| American Indian/Alaska natives               |                                                                                                                                                      |
| Other/Multi-race                             |                                                                                                                                                      |
| <b>Maternal ethnicity</b>                    | Classification of mother's Hispanic origin                                                                                                           |
| Hispanic                                     |                                                                                                                                                      |
| Non-Hispanic                                 |                                                                                                                                                      |
| <b>Maternal education</b>                    | Classification of mother's highest education level                                                                                                   |
| Below high school                            |                                                                                                                                                      |
| High school diploma                          |                                                                                                                                                      |
| Some college/Associate degree                |                                                                                                                                                      |
| Bachelor's degree and beyond                 |                                                                                                                                                      |
| <b>Date of initial hearing screen</b>        | Date when the child received his/her first hearing screening at birth                                                                                |
| <b>Result of initial hearing screening</b>   |                                                                                                                                                      |
| Pass                                         | Both ears passed the screening                                                                                                                       |
| Refer                                        | One or more ears did not pass the screening                                                                                                          |
| Not screened                                 | Infant was documented as not having been screened                                                                                                    |
| <b>Date of most recent hearing screen</b>    | Most recent follow-up outpatient hearing screening for children who did not pass the initial screening                                               |
| <b>Result of most recent hearing screen</b>  |                                                                                                                                                      |
| Pass                                         | Both ears passed the screening                                                                                                                       |
| Refer                                        | One or more ears did not pass the screening                                                                                                          |
| <b>Date of first diagnostic evaluation</b>   | Date the child first received an audiology diagnostic evaluation                                                                                     |
| <b>Result of first diagnostic evaluation</b> |                                                                                                                                                      |
| Diagnosed                                    | Completed evaluation with result of either no hearing loss or permanent hearing loss                                                                 |
| Not diagnosed (in-process)                   | Completed evaluation with result of non-permanent hearing loss, or an incomplete evaluation                                                          |
| <b>Date of first diagnosis</b>               | Date the child was first diagnosed. This would be the same as the date of first diagnostic evaluation if the result of the evaluation was diagnosed. |
| <b>Result of first diagnosis</b>             |                                                                                                                                                      |
| No hearing loss                              | No hearing loss was detected in first diagnosis                                                                                                      |
| Permanent hearing loss                       | Permanent hearing loss was diagnosed                                                                                                                 |
| <b>Date of signed IFSP†</b>                  | Date the child's IFSP was signed, indicating enrollment into Part C Early Intervention                                                               |

\*Neonatal Intensive Care Unit

\*\*Special Supplemental Nutrition Program for Women, Infants, and Children

†Individualized Family Service Plan
