# Supplementary material
Source: PubMed Central journal article supplement (PMC8436596)
Supplement: NIHMS1733959-supplement-Appendix_B.pdf [file NIHMS1733959-supplement-Appendix_B.pdf]

Appendix-B. Concentration indices (CI) of diagnosis by 90 days of age across socioeconomic groups among infants of Non-Hispanic white, Non-Hispanic black, and Hispanic mothers, nine states, 2017.

|                                    | <b>Overall</b> | <b>Non-Hispanic White</b> | <b>Non-Hispanic Black</b> | <b>Hispanic</b> |
|------------------------------------|----------------|---------------------------|---------------------------|-----------------|
| <b>n</b>                           | 8,316          | 3,996                     | 2,155                     | 1,37            |
| <b>CI</b>                          | 0.13           | 0.12                      | 0.11                      | 0.06            |
| <b>Standard error</b>              | 0.01           | 0.02                      | 0.03                      | 0.04            |
| <b>t-test CI difference from 0</b> | p < 0.01       | p < 0.01                  | p < 0.01                  | p = 0.15        |
